# Supplementary material
Source: PubMed Central journal article supplement (PMC6925572)
Supplement: NIHMS1545108-supplement-2.pdf [file NIHMS1545108-supplement-2.pdf]

# A

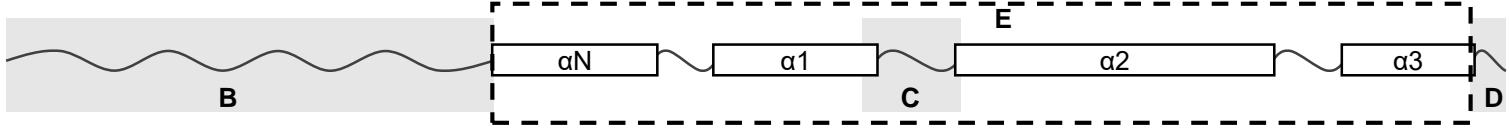

# B

|                               |       |               |     |             |         |    |            |     |            |     |            |     |        |     |          |     |        |        |
|-------------------------------|-------|---------------|-----|-------------|---------|----|------------|-----|------------|-----|------------|-----|--------|-----|----------|-----|--------|--------|
|                               | -1    | 9R            | 15- | 15-         | 16A     | 24 | 28-        | 28- | 28-        | 28- | 28-        | 32A | 33-    | 33- | 33-      | 33- | 36-    | 42-    |
| <i>A. nidulans</i> -H3-6001   | ..MAR | ..TKQTARKSTGG | ..  | ..KAPRKQLAS | ..KAAAR | .. | ..KAAAPS   | ..  | ..KAAAPS   | ..  | ..KAAAPS   | ..  | ..TKGG | ..  | ..VKKPHR | ..  | ..TKYK | ..TKYK |
| <i>C. albicans</i> -H3-54966  | ..MAR | ..TKQTARKSTGG | ..  | ..KAPRKQLAS | ..KAAAR | .. | ..KAAAPS   | ..  | ..KAAAPS   | ..  | ..KAAAPS   | ..  | ..TKGG | ..  | ..VKKPHR | ..  | ..TKYK | ..TKYK |
| <i>C. neoformans</i> -H3-1057 | ..MAR | ..TKQTARKSTGG | ..  | ..KAPRKQLAT | ..KAAAR | .. | ..KAAAPSQV | ..  | ..KAAAPSQV | ..  | ..KAAAPSQV | ..  | ..TKGG | ..  | ..VKKPHR | ..  | ..TKYK | ..TKYK |
| <i>N. crassa</i> -H3-3370     | ..MAR | ..TKQTARKSTGG | ..  | ..KAPRKQLAS | ..KAAAR | .. | ..KAAAPS   | ..  | ..KAAAPS   | ..  | ..KAAAPS   | ..  | ..TKGG | ..  | ..VKKPHR | ..  | ..TKYK | ..TKYK |
| <i>S. cerevisiae</i> -H3-253  | ..MAR | ..TKQTARKSTGG | ..  | ..KAPRKQLAS | ..KAAAR | .. | ..KAAAPS   | ..  | ..KAAAPS   | ..  | ..KAAAPS   | ..  | ..TKGG | ..  | ..VKKPHR | ..  | ..TKYK | ..TKYK |
| <i>S. pombe</i> -H3-1974      | ..MAR | ..TKQTARKSTGG | ..  | ..KAPRKQLAS | ..KAAAR | .. | ..KAAAPFA  | ..  | ..KAAAPFA  | ..  | ..KAAAPFA  | ..  | ..TKGG | ..  | ..VKKPHR | ..  | ..TKYK | ..TKYK |
| <i>U. maydis</i> -H3-9945     | ..MAR | ..TKQTARKSTGG | ..  | ..KAPRKQLAT | ..KAAAR | .. | ..KAAAPS   | ..  | ..KAAAPS   | ..  | ..KAAAPS   | ..  | ..TKGG | ..  | ..VKKPHR | ..  | ..TKYK | ..TKYK |

# C

|                               |           |     |             |     |           |     |           |     |
|-------------------------------|-----------|-----|-------------|-----|-----------|-----|-----------|-----|
|                               | 64        | 69Q | 72-         | 72- | 72-       | 72R | 80-       | 84F |
| <i>A. nidulans</i> -H3-6001   | ..KLPFQRV | ..  | ..REIAQDFKS | ..  | ..DLRFQAS | ..  | ..DLRFQAS |     |
| <i>C. albicans</i> -H3-54966  | ..KLPFQRV | ..  | ..REIAQDFKT | ..  | ..DLRFQAS | ..  | ..DLRFQAS |     |
| <i>C. neoformans</i> -H3-1057 | ..KLPFQRV | ..  | ..REIAQDFKS | ..  | ..DLRFQAS | ..  | ..DLRFQAS |     |
| <i>N. crassa</i> -H3-3370     | ..KLPFQRV | ..  | ..REIAQDFKS | ..  | ..DLRFQAS | ..  | ..DLRFQAS |     |
| <i>S. cerevisiae</i> -H3-253  | ..KLPFQRV | ..  | ..REIAQDFKT | ..  | ..DLRFQAS | ..  | ..DLRFQAS |     |
| <i>S. pombe</i> -H3-1974      | ..KLPFQRV | ..  | ..REIAQDFKT | ..  | ..DLRFQAS | ..  | ..DLRFQAS |     |
| <i>U. maydis</i> -H3-9945     | ..KLPFQRV | ..  | ..REIAQDFKT | ..  | ..DLRFQAS | ..  | ..DLRFQAS |     |

# D

|                               |        |          |      |
|-------------------------------|--------|----------|------|
|                               | 126    | 132R     | 136- |
| <i>A. nidulans</i> -H3-6001   | ..LARR | ..LRGERS | ..   |
| <i>C. albicans</i> -H3-54966  | ..LARR | ..LRGERS | ..   |
| <i>C. neoformans</i> -H3-1057 | ..LARR | ..LRGERS | ..   |
| <i>N. crassa</i> -H3-3370     | ..LARR | ..LRGERS | ..   |
| <i>S. cerevisiae</i> -H3-253  | ..LARR | ..LRGERS | ..   |
| <i>S. pombe</i> -H3-1974      | ..LARR | ..LRGERS | ..   |
| <i>U. maydis</i> -H3-9945     | ..LARR | ..LRGERS | ..   |

# E

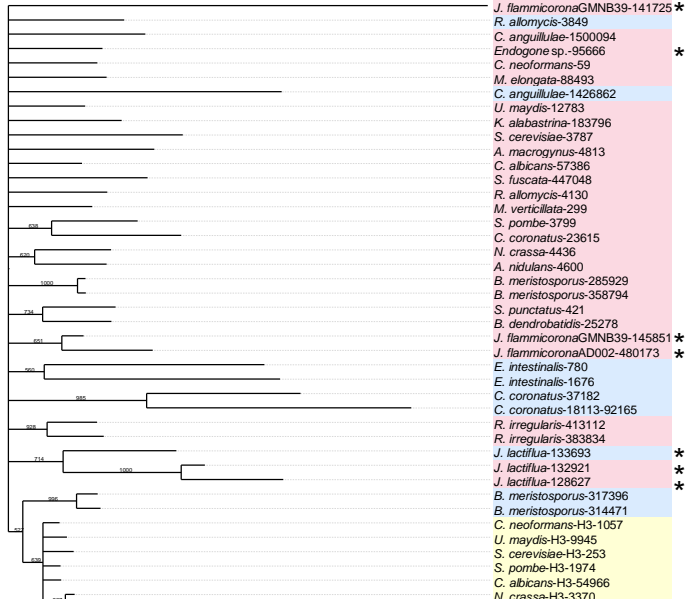

**Figure S1. Mucorales and Umbelopsidales lack CENP-A. Related to Figure 1. (A)** Schematic of canonical histone H3 and CENP-A shared protein features. **(B-D)** Multiple protein sequence alignments of the N-tail **(B)**, Loop 1 **(C)**, and C-terminal **(D)** regions. The scale above the comparisons indicates the amino acid positions with *S. pombe* sequence as the reference. Red arrows mark relevant amino acid positions. Amino acids are colored in increasing shades of blue to show conservation within each group. **(E)** Neighbor-joining phylogenetic tree (JTT model) of the Histone Folding Domain (HFD), showing phylogenetic distance (branch length) and branch support (1000 bootstraps). Branches with < 50% bootstrap support are collapsed. The protein sequences analyzed in **B** to **E** are distributed among three groups: well-studied histone H3 (yellow), rare histone H3 (blue), and the predicted CENP-A proteins in this study (red). Asterisks (\*) indicate proteins from the Mucoromycotina.

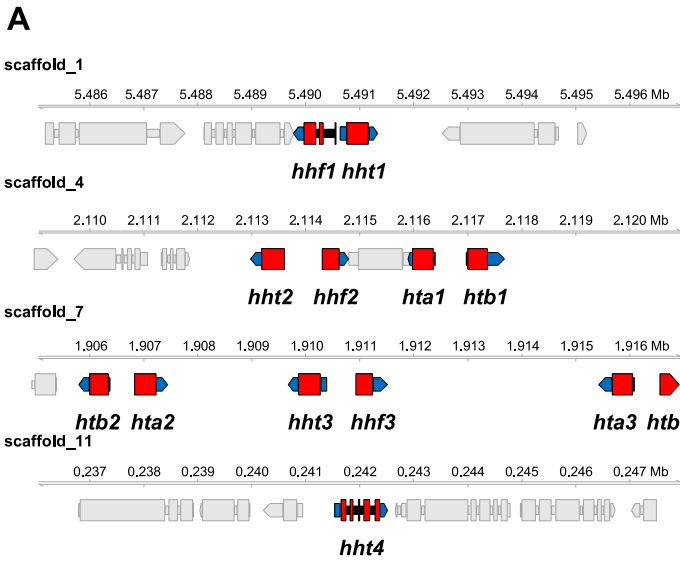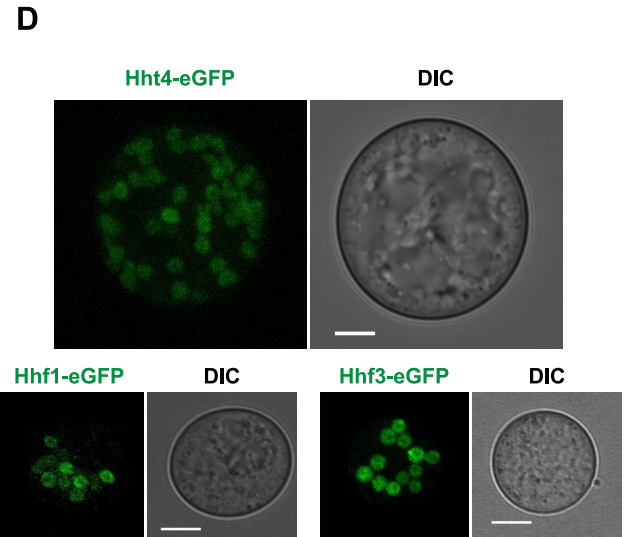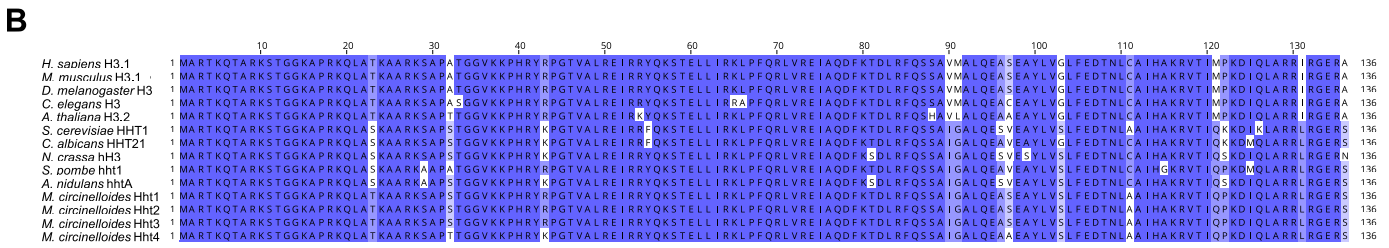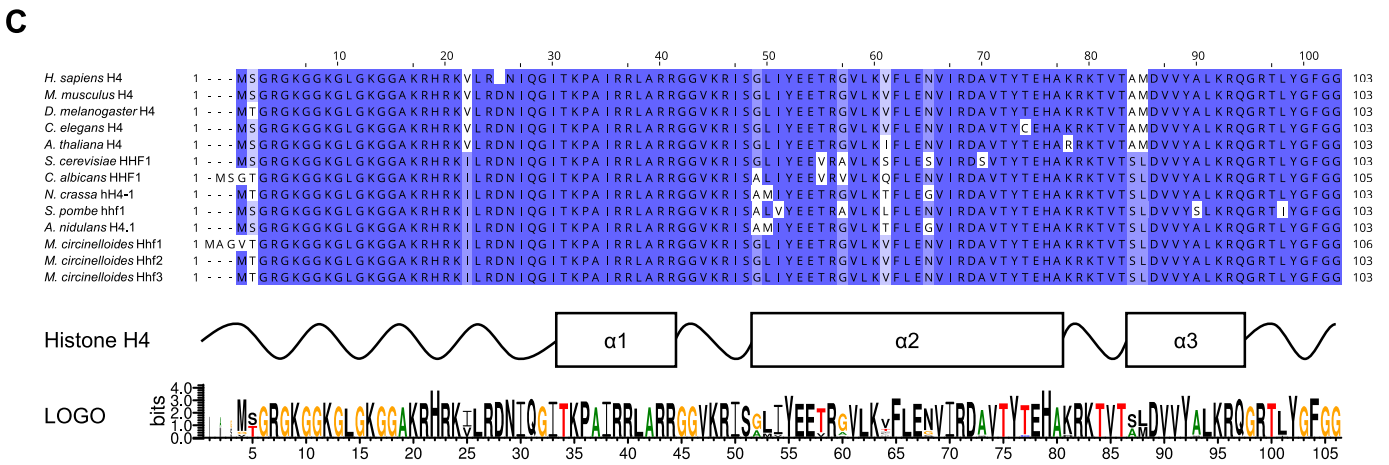

**Figure S2. *M. circinelloides* histones H3 and H4 are not centromere-specific binding proteins. Related to Figure 2.** (A) Location of all the histone H2A, H2B, H3, and H4-coding genes in the *M. circinelloides* genome. Genes are represented by arrows showing transcription direction; the coding sequence is depicted as larger red blocks, flanked by smaller blue blocks representing the untranslated regions, and connected by black lines as intronic sequences. Light-gray arrows indicate neighboring non-histone genes and their transcription direction. (B, C) Protein alignment of several well-characterized H3 (B) and H4 (C) histones with *M. circinelloides* orthologs. A scale indicates the amino acid positions taking *S. pombe* sequence as the reference. Histone fold domains (HFD) are outlined in a diagram below each alignment, as well as the N-terminal tail. Amino acids are colored in increasing shades of blue and a consensus protein logo is provided to reflect conservation. (D) Confocal microscopy images of *M. circinelloides* strains expressing eGFP-fluorescent fusion histone proteins Hht4, Hhf1, and Hhf3 in 4-hour pregerminated spores. The fluorescent signal is colored as green. A calibrated scale (white bar) is provided for size comparison (5  $\mu$ m).

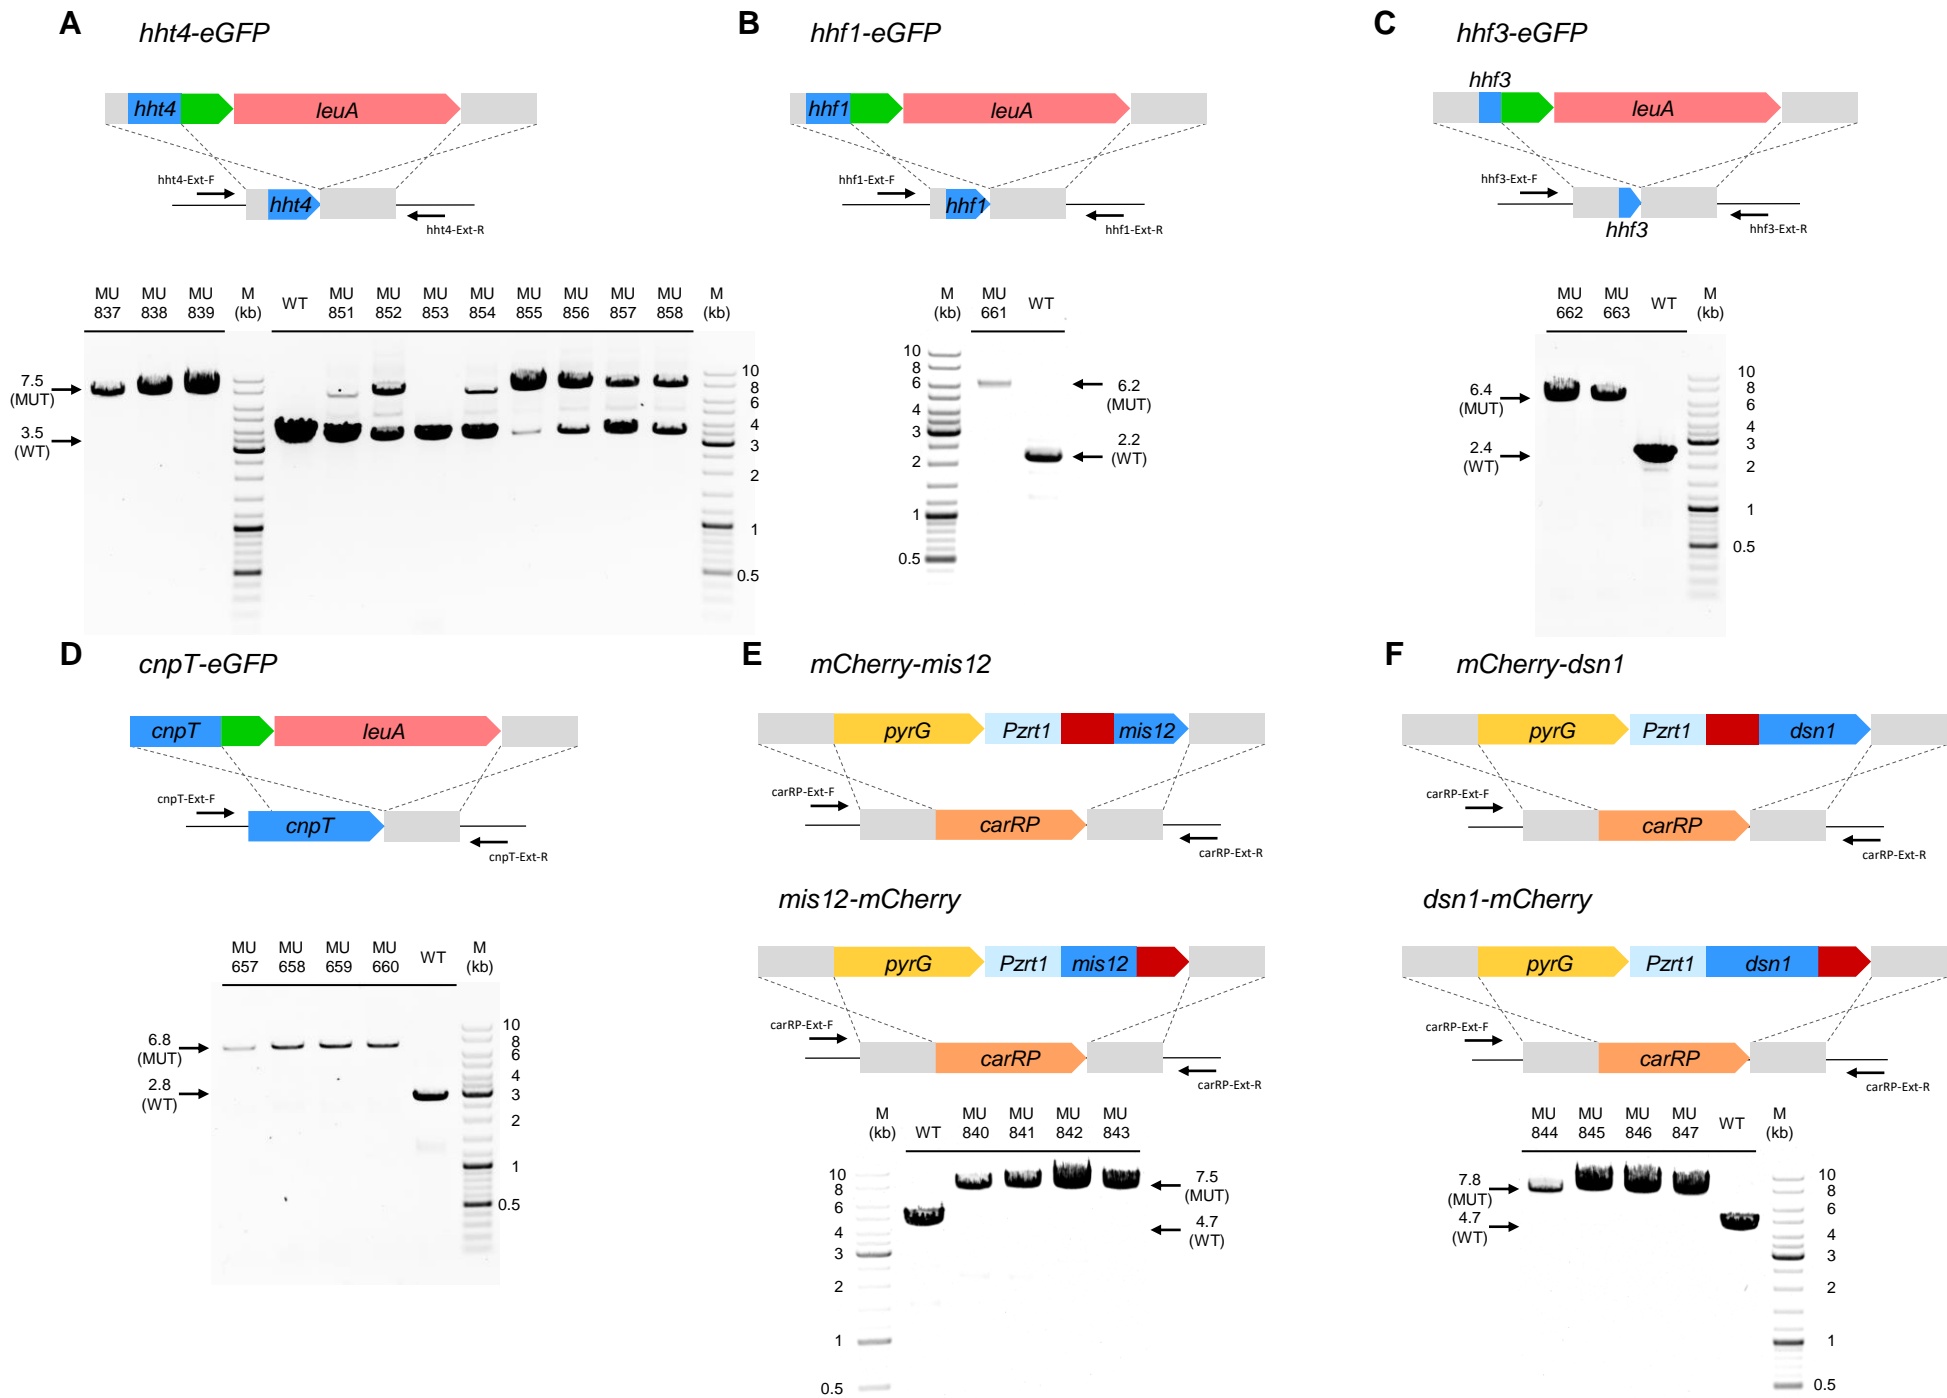

**Figure S3. Generation of mutant strains expressing fluorescent fusion histones and kinetochore proteins. Related to Figure 2 and Table S2.** Diagram (above) and agarose gel images (below) showing the integration of the *hht4* (A), *hhf1* (B), and *hhf3* (C), and *cnpT* (D) fusion alleles into their wild-type loci; and the *mis12* (E) and *dsn1* (F) fusion alleles (both N-terminal and C-terminal fusions) into the *carRP* locus. Discontinuous crosses indicate homologous recombination and arrows mark the annealing regions for specific primers used to confirm the integration by PCR, amplifying both the wild-type (WT) and mutant (MUT) alleles shown in the gel images. M lanes were loaded with the GeneRuler DNA Ladder Mix (Thermo Fisher) to estimate the fragment sizes. Red and green regions indicate mCherry and eGFP genes, respectively.

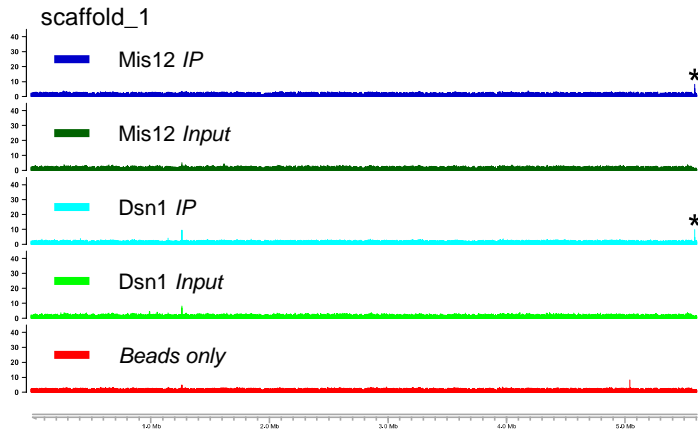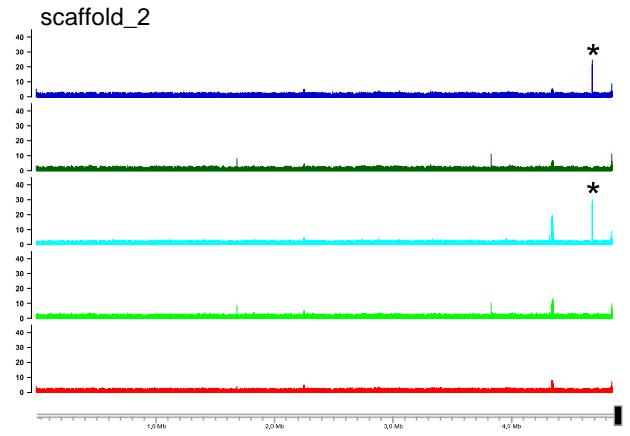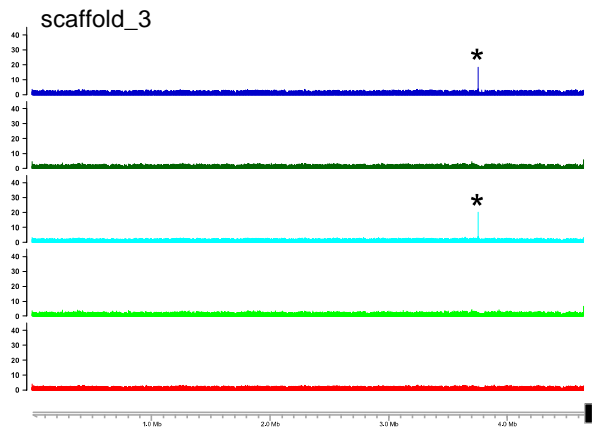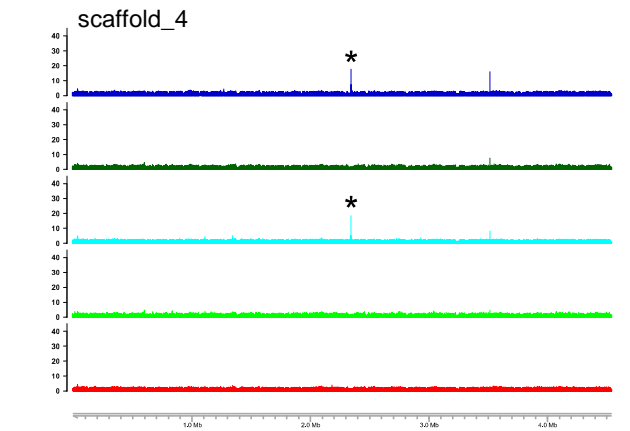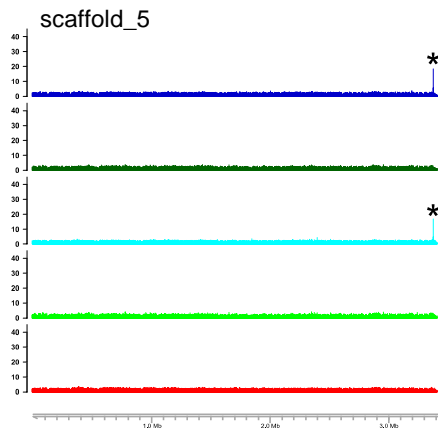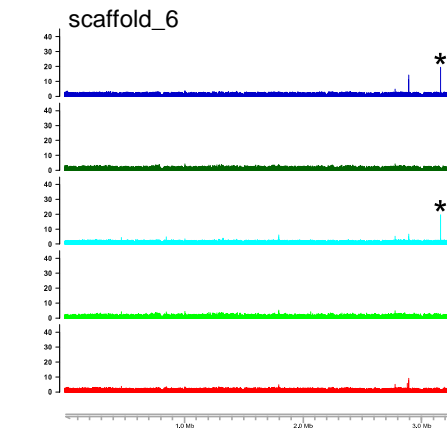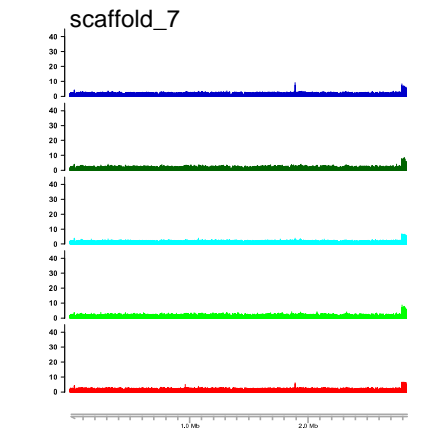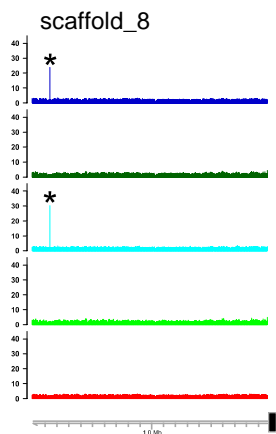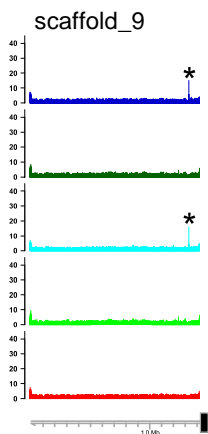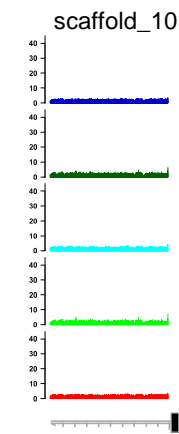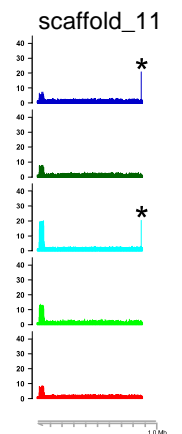

**Figure S4. *M. circinelloides* kinetochore protein-bound regions. Related to Figures 3 and 4, and Data S1.** *IP* enrichment (coverage x1) of immunoprecipitated DNA (*IP* DNA) from Mis12 and Dsn1 mCherry-tagged strains compared to their corresponding input (*Input* DNA) and binding controls (*beads only* DNA), shown as color-coded tracks across the whole sequence of scaffolds 1-11. Asterisks (\*) mark significant peaks ( $FDR \leq 5 \times 10^{-5}$ , fold enrichment  $\geq 1.6$ ) in both *IP* DNA samples that are not present in the controls, indicating the putative centromeric regions. Each kinetochore-protein data was obtained from a pool of duplicated *IP* DNA samples. Black rectangles at either end of the genomic axis marks a repeated telomeric sequence.



**CEN1**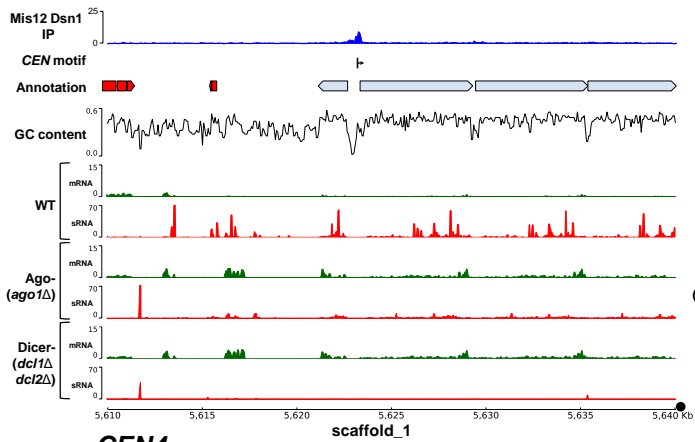**CEN2**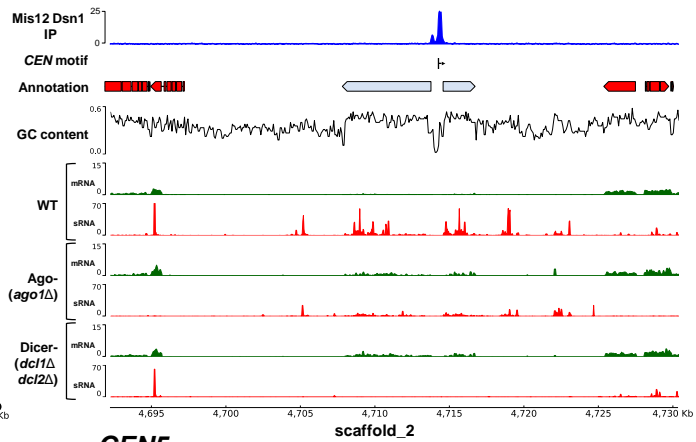**CEN3**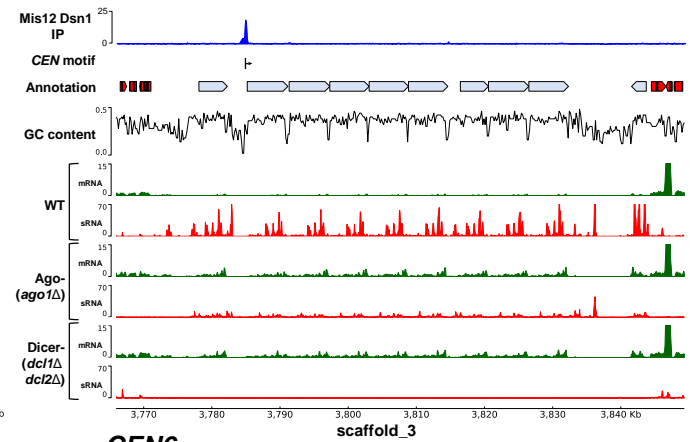**CEN4**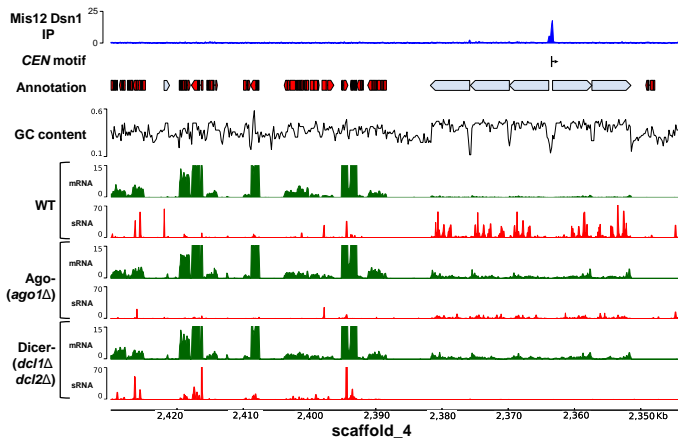**CEN5**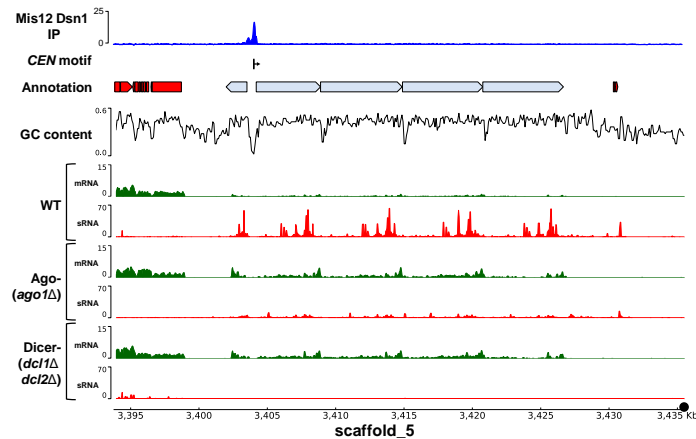**CEN6**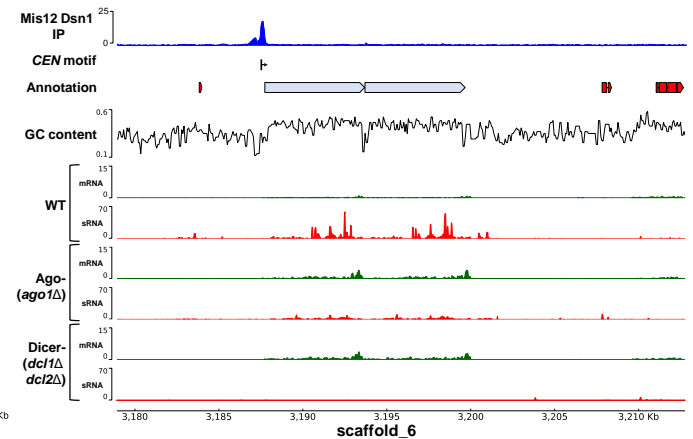**CEN8**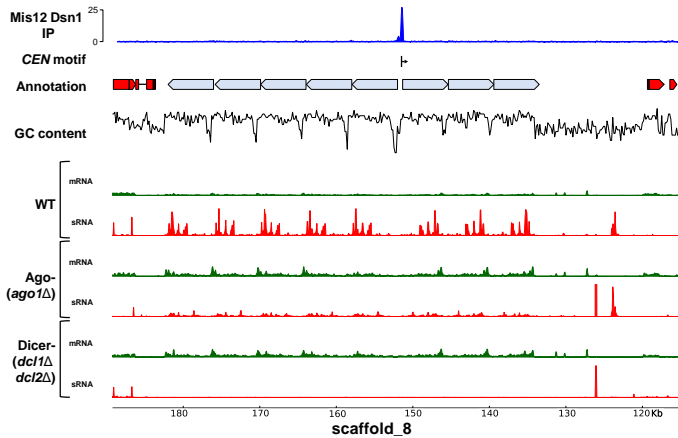**CEN9**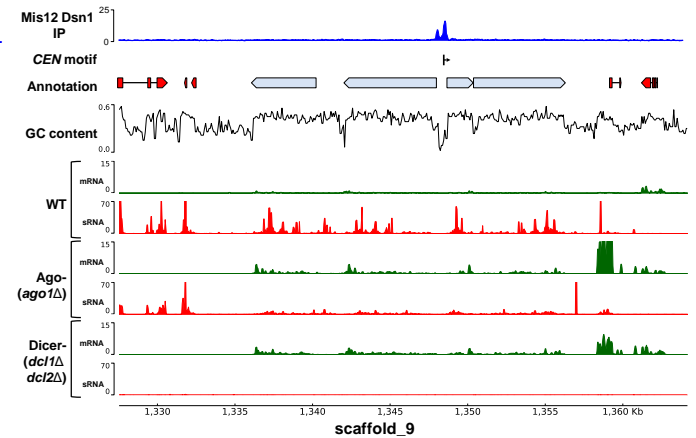**CEN11**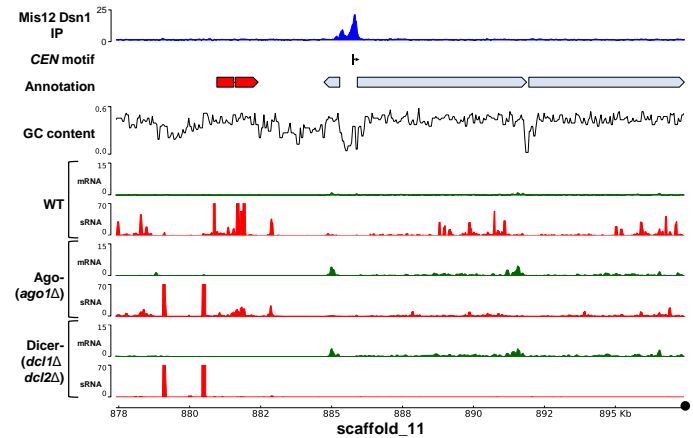

**Figure S5. *M. circinelloides* pericentromeric regions. Related to Figure 5 and Table S3.** A genomic view of the pericentromeric regions of all nine centromeres. Each region shows the kinetochore-binding region enrichment (IP, an average of both *IP* signals minus *Input* and *Beads only* controls), annotated genes (red blocks) and transposable elements (light blue blocks), *CEN*-specific DNA motif position (black vertical line) and its direction (arrow), GC content, and transcriptomic data of mRNA (green) and sRNAs (red) in *M. circinelloides* wild-type strain, and *ago1* and double *dcl1 dcl2* deletion mutants after 48 h of growth in rich media. A black circle at either end of the genomic axis indicates an abrupt, non-telomeric end of that scaffold.

**A**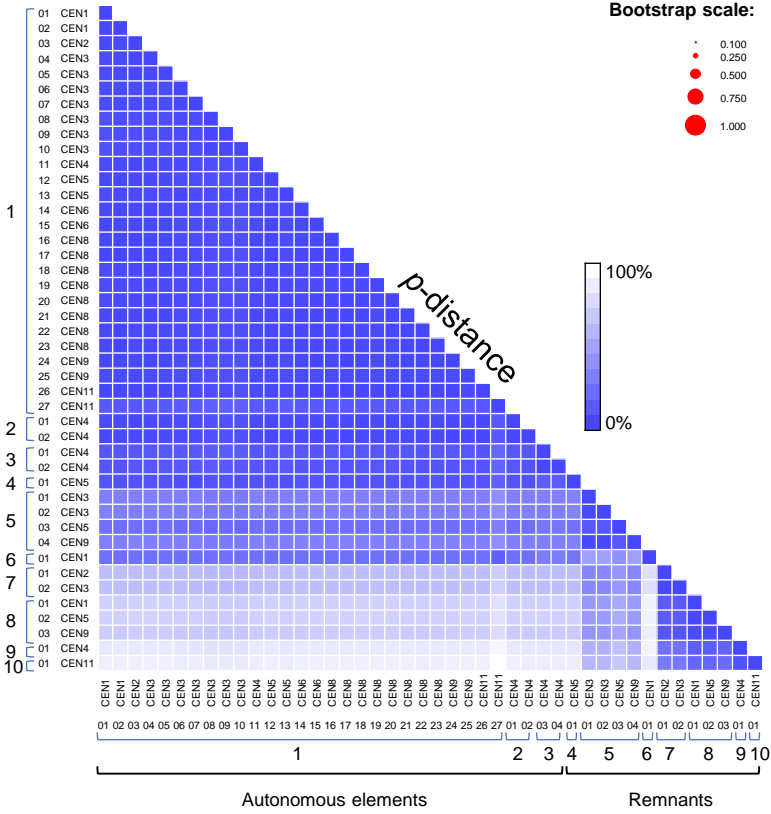**B**

Tree scale: 0.1

Bootstrap scale:

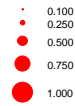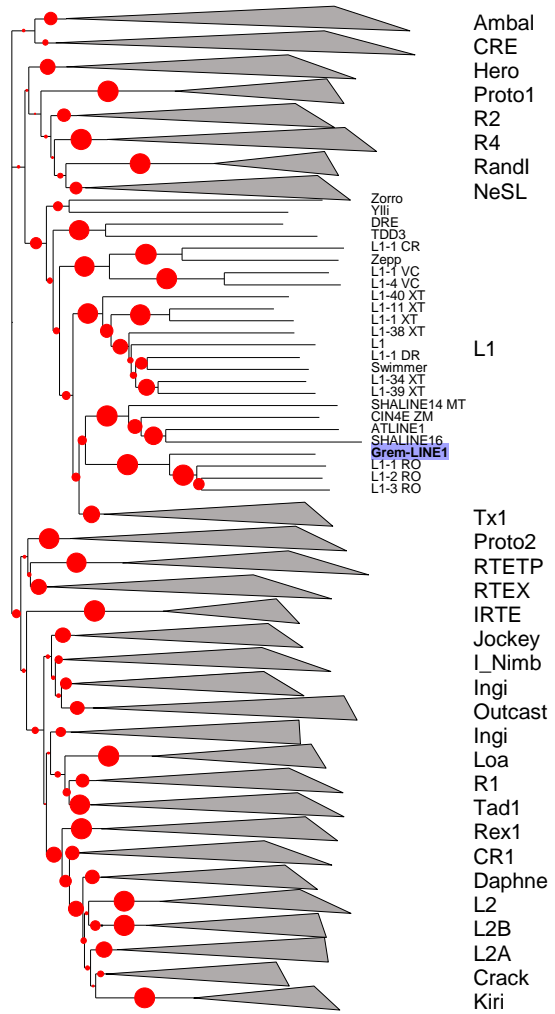

**Figure S6. Centromere-specific non-LTR L1-like retrotransposable elements. Related to Figure 5, and Tables S3 and S4.** (A) Matrix showing pairwise *p*-distance (% changes per site) across all 44 repetitive elements flanking the centromeres of *M. circinelloides*. Elements sharing  $\geq 95.0\%$  identity are clustered together, generating 10 groups that comprise full-length elements and incomplete sequences (remnants). Elements belonging to the same centromere have been clustered together within each separated group. (B) Neighbor-joining phylogeny (JTT model) of the RVT domain of well-known non-LTR elements. The RVT domain of the centromere-specific element (Grem-LINE1) identified in this study is marked inside a blue box. Phylogenetic distance (branch length) and branch support (1000 bootstraps, size-coded circles) are shown. Leaves within the same clade of non-LTR retrotransposons are collapsed, forming a scalene triangle (top and bottom corners show the shortest and longest phylogenetic distance, respectively); except for the L1 clade which contains the Grem-LINE-1.

| Name                  | Sequence                                     | Use                                             |
|-----------------------|----------------------------------------------|-------------------------------------------------|
| <i>mCherry-F</i>      | ATGGTGAGCAAGGGCGAGGA                         | <i>mCherry</i> and <i>eGFP</i> amplification    |
| <i>mCherry-R</i>      | CTTGTACAGCTCGTCCATGC                         | <i>mCherry</i> and <i>eGFP</i> amplification    |
| <i>mCherry-R-leuA</i> | gaatagagtggtagggagcaTACTTGTACAGCTCGTCCATGC   | <i>eGFP</i> tagging with marker <i>leuA</i>     |
| <i>leuA3kbFow</i>     | TGCTCCCTACCAACTCTATTC                        | <i>leuA</i> amplification                       |
| <i>leuA3kbRev</i>     | GTCGAGTTGACCAGAATGTAC                        | <i>leuA</i> amplification                       |
| <i>pyrGFow2kb</i>     | TGCCTCAGCATTGGTACTTG                         | <i>pyrG</i> amplification                       |
| <i>pyrGRev2Kb</i>     | GTACACTGGCCATGCTATCG                         | <i>pyrG</i> amplification                       |
| <i>Pzt1-F</i>         | cgatagcatggccagtgtacATCATCATCGATGTTTGTGCTGTC | Construction of pMAT1915                        |
| <i>Pzt1-R</i>         | CTCGAGATTTAGTTATTTTG                         | Construction of pMAT1915                        |
| <i>carRP-Inv-F</i>    | caagtaccaatgctgaggcaCCATATTGAGTCATCCTGCAACG  | Construction of pMAT1915                        |
| <i>carRP-Inv-R</i>    | TACCACACATTGCAGACAGG                         | Construction of pMAT1915                        |
| <i>hht4-1</i>         | tacat <u>gggcc</u> TCGCAATCATCCATGAAGTG      | Hht4 tagging with <i>eGFP</i> at C-terminus     |
| <i>hht4-2</i>         | tcctcgcccttgctcacatAGAGCGTTCACCACGAAGA       | Hht4 tagging with <i>eGFP</i> at C-terminus     |
| <i>hht4-3</i>         | gtacattctggcaactcgacATCATCATCTGATGTCTTTCTT   | Hht4 tagging with <i>eGFP</i> at C-terminus     |
| <i>hht4-4</i>         | tacat <u>ccg</u> ATGGCTCTGAAGTGATCCAC        | Hht4 tagging with <i>eGFP</i> at C-terminus     |
| <i>hhf1-1</i>         | tacat <u>gtcgac</u> ACCAACAAACGTCACCTAGAGTAG | Hhf1 tagging with <i>eGFP</i> at C-terminus     |
| <i>hhf1-2</i>         | tcctcgcccttgctcacatTCCACCGAAACCGTAGAGGG      | Hhf1 tagging with <i>eGFP</i> at C-terminus     |
| <i>hhf1-3</i>         | gtacattctggcaactcgacATCAAATCCCTCTGCTCATTAC   | Hhf1 tagging with <i>eGFP</i> at C-terminus     |
| <i>hhf1-4</i>         | tacat <u>ctgcag</u> CAACACGGGTGGTTTGGAG      | Hhf1 tagging with <i>eGFP</i> at C-terminus     |
| <i>hhf3-1</i>         | tacat <u>gtcgac</u> CCTAAAAGGGACAAAGATTATGGC | Hhf3 tagging with <i>eGFP</i> at C-terminus     |
| <i>hhf3-2</i>         | tcctcgcccttgctcacatTCCACCGAAACCGTAGAGGG      | Hhf3 tagging with <i>eGFP</i> at C-terminus     |
| <i>hhf3-3</i>         | gtacattctggcaactcgacATGCAATTCATCATGCTTCTCAC  | Hhf3 tagging with <i>eGFP</i> at C-terminus     |
| <i>hhf3-4</i>         | tacat <u>ctgcag</u> TGACAGGGCTTTTCGCTTAGC    | Hhf3 tagging with <i>eGFP</i> at C-terminus     |
| <i>cnpT-1</i>         | cgaggtcgacggtatcgataCACGGCAGCAGCAGCAACATAC   | CENP-T tagging with <i>eGFP</i> at C-terminus   |
| <i>cnpT-2</i>         | tcctcgcccttgctcacatTTCGTCTTCATTATCGTATCCACCG | CENP-T tagging with <i>eGFP</i> at C-terminus   |
| <i>cnpT-3</i>         | gtacattctggcaactcgacCTGTGATTGGTTGCCATGGTGG   | CENP-T tagging with <i>eGFP</i> at C-terminus   |
| <i>cnpT-4</i>         | caggaattcgatatcaagcTTGCTCGTGTATAGAACGAATCCAG | CENP-T tagging with <i>eGFP</i> at C-terminus   |
| <i>mis12-1</i>        | tcctcgcccttgctcacatTGGATCTGATGGCTGCTGG       | Mis12 tagging with <i>mCherry</i> at C-terminus |
| <i>mis12-2</i>        | caaaataactaaatctcgagGATGCAAACCGACGAAAGCTA    | Mis12 tagging with <i>mCherry</i> at C-terminus |
| <i>mis12-3</i>        | cctgtctgcaatgtgtggaTAGTTTGAGAAGATTGTGGAGC    | Mis12 tagging with <i>mCherry</i> at N-terminus |
| <i>mis12-4</i>        | ggcatggacgagctgtacaagATGCAAACCGACGAAAGCTA    | Mis12 tagging with <i>mCherry</i> at N-terminus |
| <i>dsn1-1</i>         | tcctcgcccttgctcacatTGGATCCTCCATCACAGAAGAT    | Dsn1 tagging with <i>mCherry</i> at C-terminus  |
| <i>dsn1-2</i>         | caaaataactaaatctcgagATGTCGGATAGACGCTTAAG     | Dsn1 tagging with <i>mCherry</i> at C-terminus  |

|                       |                                           |                                                                                     |
|-----------------------|-------------------------------------------|-------------------------------------------------------------------------------------|
| <i>dsn1-3</i>         | cctgtctgcaatgtgtggaCCCAACAGTAGAGCATCTTGG  | Dsn1 tagging with mCherry at N-terminus                                             |
| <i>dsn1-4</i>         | ggcatggacgagctgtacaagATGTCGGATAGACGCTTAAG | Dsn1 tagging with mCherry at N-terminus                                             |
| <i>hht4-ext-F</i>     | GCTACCTTGGATACCTGGAACA                    | <i>hht4</i> PCR confirmation                                                        |
| <i>hht4-ext-R</i>     | CGAGTAAGGACGCCGTAGAC                      | <i>hht4</i> PCR confirmation                                                        |
| <i>hhf1-Ext-F</i>     | GCTTCTTGACACCACCAGTAGAG                   | <i>hhf1</i> PCR confirmation                                                        |
| <i>hhf1-Ext-R</i>     | GAATAGGTGGACAAGATGGGACT                   | <i>hhf1</i> PCR confirmation                                                        |
| <i>hhf3-Ext-F</i>     | TATCTGTGAGGCTTCTTGACACC                   | <i>hhf3</i> PCR confirmation                                                        |
| <i>hhf3-Ext-R</i>     | CGCTAAGTCCAAAGCAACTCTC                    | <i>hhf3</i> PCR confirmation                                                        |
| <i>cnpT-Ext-F</i>     | CTTTTACCCTCTCAACCACGAG                    | <i>cnpT</i> PCR confirmation                                                        |
| <i>cnpT-Ext-R</i>     | GCCTGTTTCAGATTGAGGGAAT                    | <i>cnpT</i> PCR confirmation                                                        |
| <i>carRP-Ext-F</i>    | GGGCACATTGACGTAGAAGG                      | <i>mis12</i> and <i>dsn1</i> integration in the <i>carRP</i> locus PCR confirmation |
| <i>carRP-Ext-R</i>    | GCTGTTGCTGTGCTAACATCAT                    | <i>mis12</i> and <i>dsn1</i> integration in the <i>carRP</i> locus PCR confirmation |
| <i>CEN2</i> core-F    | GTTTCCTGAACGGGCTATTTG                     | 104 bp amplicon for ChIP-qPCR                                                       |
| <i>CEN2</i> core-R    | ACTGACAAAGTGTCCAAACCGA                    | 104 bp amplicon for ChIP-qPCR                                                       |
| <i>CEN2</i> 1L-F      | GTACTGATGAAGCAAGAGGCG                     | 118 bp amplicon for ChIP-qPCR                                                       |
| <i>CEN2</i> 1L-R      | AGCTCTTTGTTCTCTGCTACCTTG                  | 118 bp amplicon for ChIP-qPCR                                                       |
| <i>CEN2</i> 2L-F      | CCTTCCTGTTTTGATTGGCGG                     | 99 bp amplicon for ChIP-qPCR                                                        |
| <i>CEN2</i> 2L-R      | TTGGCTTGCTAGAAGCACTTG                     | 99 bp amplicon for ChIP-qPCR                                                        |
| <i>CEN2</i> 1R-F      | GCAAACGTTTCATGGTAGTGCAAG                  | 123 bp amplicon for ChIP-qPCR                                                       |
| <i>CEN2</i> 1R-R      | CTTCAGGTTGTGACAGATGTATGCA                 | 123 bp amplicon for ChIP-qPCR                                                       |
| <i>CEN2</i> 2R-F      | TGGGAAATTCATCAAGGCCAGTGCC                 | 98 bp amplicon for ChIP-qPCR                                                        |
| <i>CEN2</i> 2R-R      | GAACCTCCTTTAGGGCCATGTTG                   | 98 bp amplicon for ChIP-qPCR                                                        |
| <i>CEN2</i> ORF-L-F   | AAATTGCAGGACAGAAAAGACGC                   | 126 bp amplicon for ChIP-qPCR                                                       |
| <i>CEN2</i> ORF-L-R   | CATGTCCAGCGCATCGCTTGATA                   | 126 bp amplicon for ChIP-qPCR                                                       |
| <i>CEN2</i> ORF-R-F   | CAATTGACACGATGGGACTTTGAC                  | 102 bp amplicon for ChIP-qPCR                                                       |
| <i>CEN2</i> ORF-R-R   | CAGTTTGACGCCGTATTGGAATG                   | 102 bp amplicon for ChIP-qPCR                                                       |
| Far- <i>CEN</i> ORF-F | CCTTGCCACTACCATCTGCTTC                    | 107 bp amplicon for ChIP-qPCR                                                       |
| Far- <i>CEN</i> ORF-R | ATCATCCATTCCCTCTTGTGCC                    | 107 bp amplicon for ChIP-qPCR                                                       |

**Table S2. Primers used in this study. Related to Figure 2, 5, and S3.**

<sup>a</sup>Lowercase bases do not anneal to the the gene locus indicated in the table

<sup>b</sup>Underlined sequences are restriction sites
